# Supplementary material
Source: MDPI journal article supplement (https://www.mdpi.com/search?q=biology-14-00381)
Supplement: s001 [file biology-14-00381-s001.zip]

Table S1 Ingredients composition and analysis of the experimental diets (%)

| Ingredients                | Percent      |
|----------------------------|--------------|
| Fish meal                  | 48           |
| Soybean meal               | 22           |
| Wheat flour                | 11.5         |
| Fish oil                   | 4.5          |
| Soybean oil                | 2            |
| Soybean lecithin           | 2            |
| Vitamin and Mineral mix    | 4            |
| Dicacium phosphate         | 1            |
| Choline chloride           | 1            |
| Microcrystalline cellulose | 4            |
| Moisture                   | 8.65 ± 0.08  |
| Crude protein              | 47.18 ± 2.04 |
| Crude fat                  | 14.58 ± 0.91 |
| Ash                        | 13.39 ± 0.18 |
